# Supplementary material for: One-step solvothermal carbonization to microporous carbon materials derived from cyclodextrins
Source: Royal Society of Chemistry journal article supplement (doi:10.1039/c3ta10227k), 2013-01-01
Supplement: c3ta10227k.pdf [file c3ta10227k.pdf]

**Electronic supplementary information (ESI) for**

**One-step solvothermal carbonization to  
microporous carbon materials derived from  
cyclodextrins**

Yan-Chao Zhao,<sup>†,‡</sup> Li Zhao,<sup>†</sup> Li-Juan Mao,<sup>†</sup> and Bao-Hang Han<sup>\*,†,‡</sup>

<sup>†</sup> *National Center for Nanoscience and Technology, Beijing 100190, China*

<sup>‡</sup> *College of Science, National University of Defense Technology,  
Changsha 410073, China*

Tel: +86 10 8254 5576. Email: [hanbh@nanoctr.cn](mailto:hanbh@nanoctr.cn).

**Table S1** Results of the energy dispersive X-ray (EDX) analysis for **CDPC** (Atomic percentage)

| Sample       | Carbon | Oxygen | Sulfur |
|--------------|--------|--------|--------|
| <b>aCDPC</b> | 95.81  | 3.78   | 0.39   |
| <b>bCDPC</b> | 95.68  | 3.88   | 0.43   |
| <b>gCDPC</b> | 96.68  | 2.75   | 0.56   |
| <b>HMFPC</b> | 95.89  | 3.33   | 0.76   |

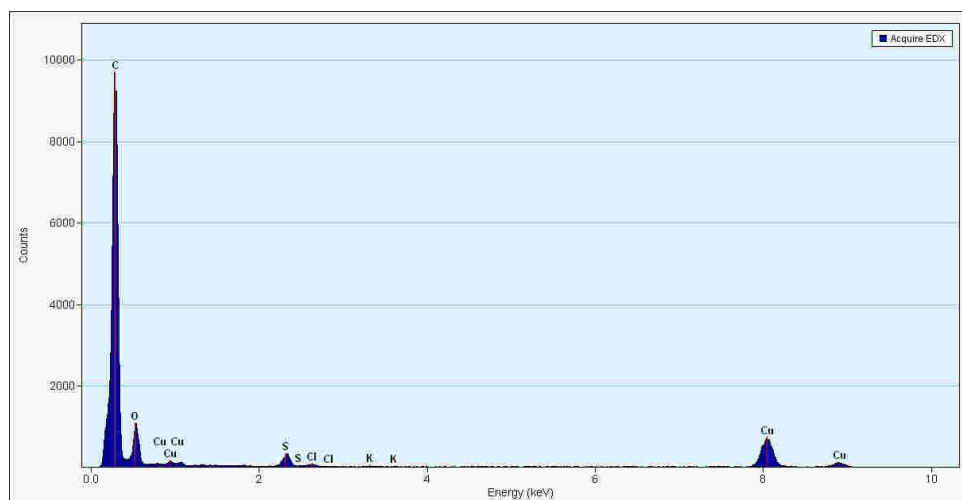

**Fig. S1** EDX spectrum of aCDPC.

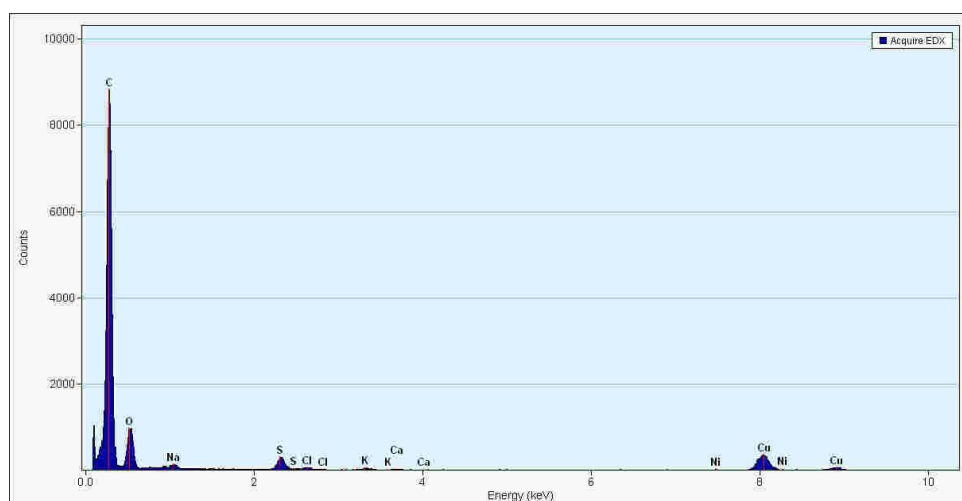

**Fig. S2** EDX spectrum of bCDPC.

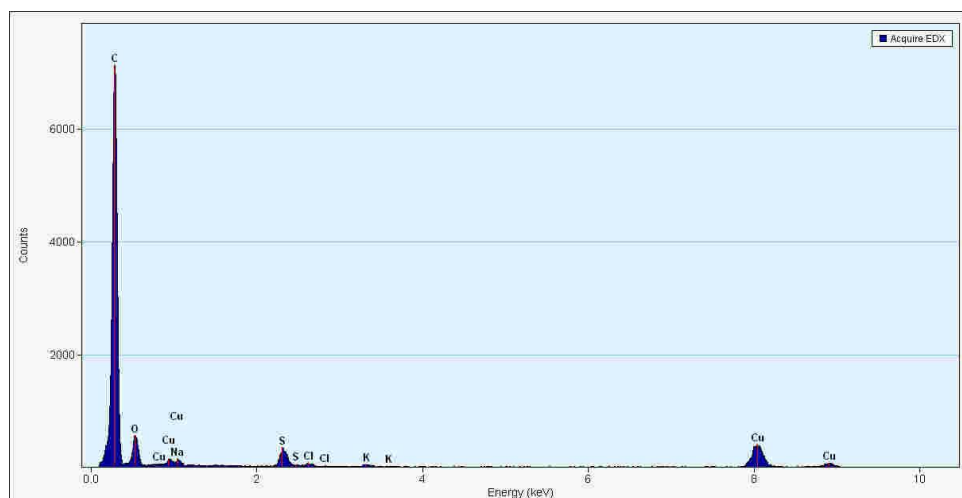

**Fig. S3** EDX spectrum of **gCDPC**.

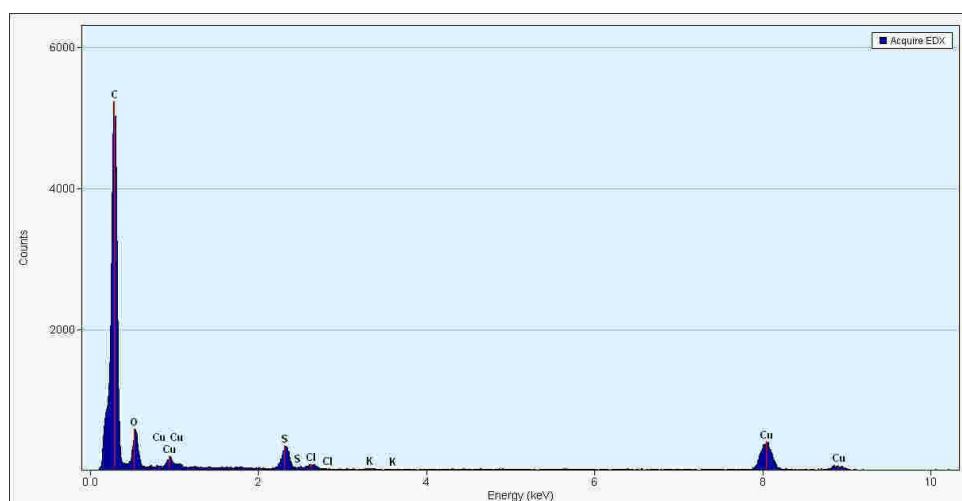

**Fig. S4** EDX spectrum of **HMFPC**.

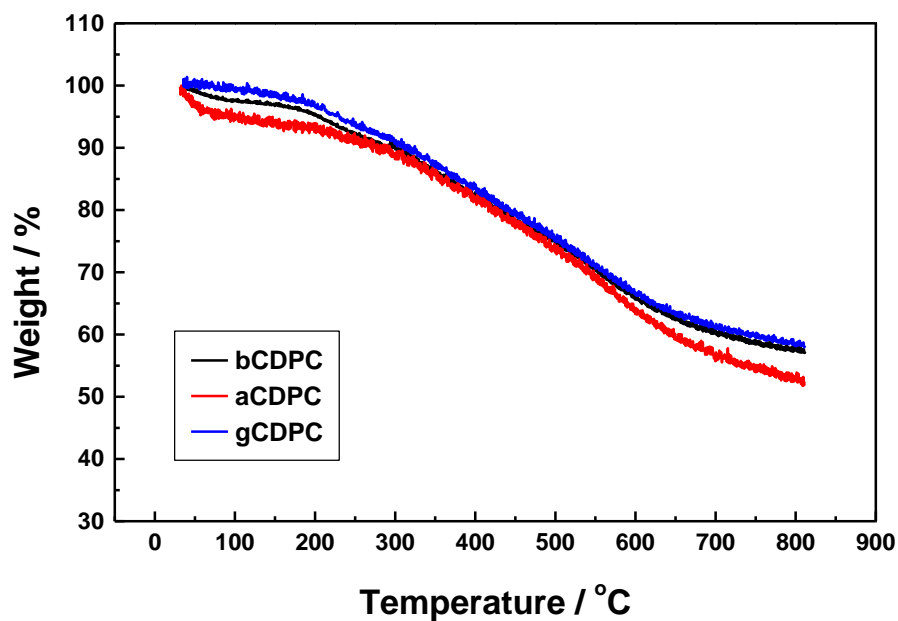

Fig. S5 Thermogravimetric analysis (TGA) of aCDPC, bCDPC, and gCDPC.

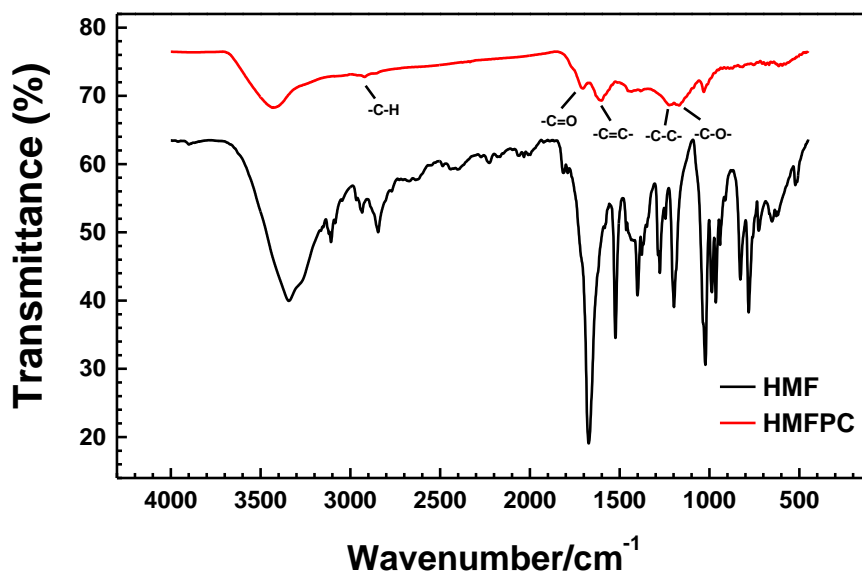

Fig. S6 FT-IR spectra of 5-hydroxymethyl-2-furaldehyde (HMF) and HMFPC.

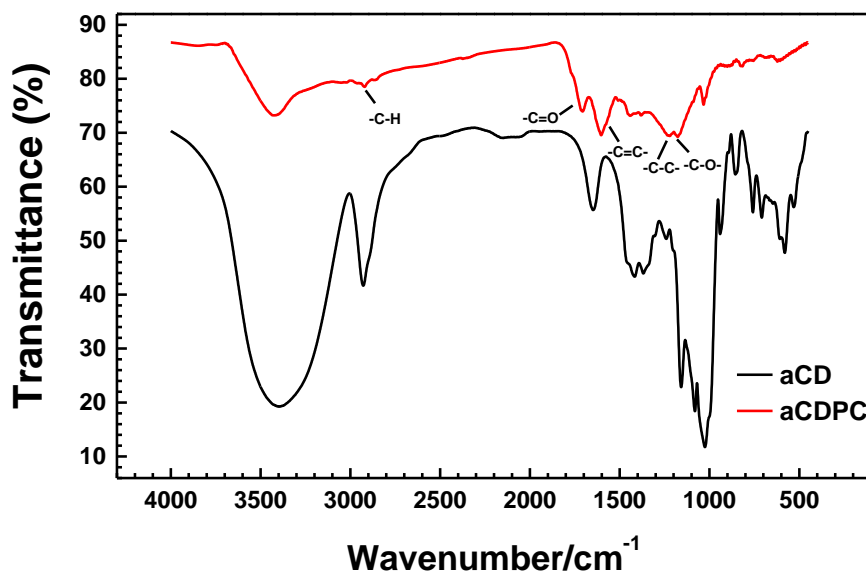

Fig. S7 FT-IR spectra of  $\alpha$ -cyclodextrin (aCD) and aCDPC.

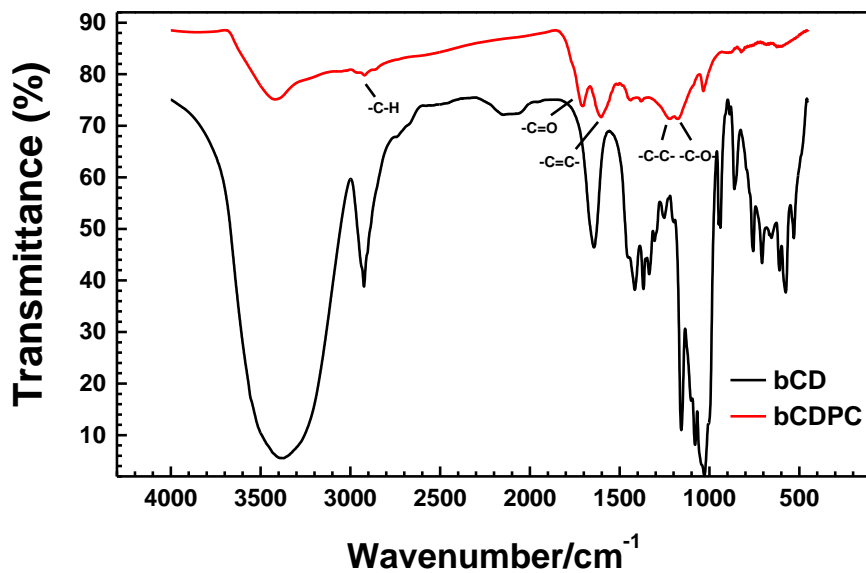

Fig. S8 FT-IR spectra of  $\beta$ -cyclodextrin (bCD) and bCDPC.

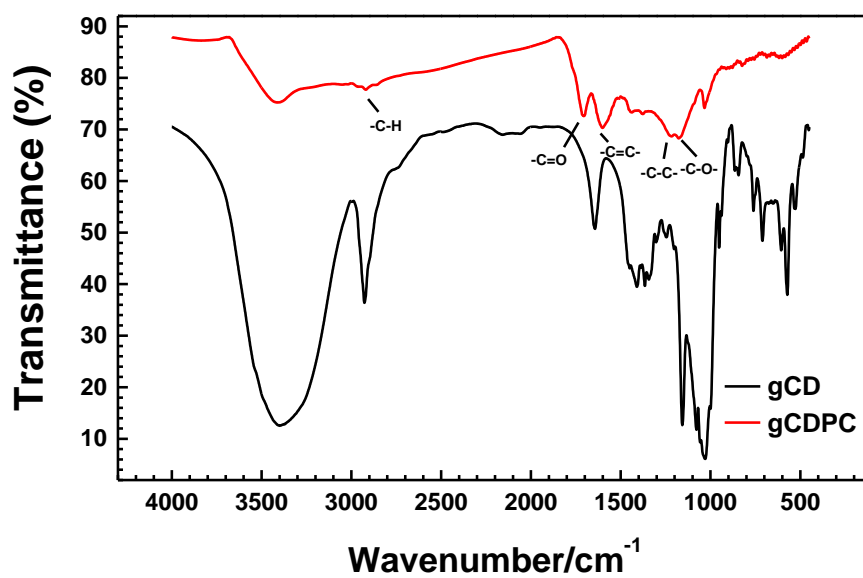

**Fig. S9** FT-IR spectra of  $\gamma$ -cyclodextrin (gCD) and gCDPC.

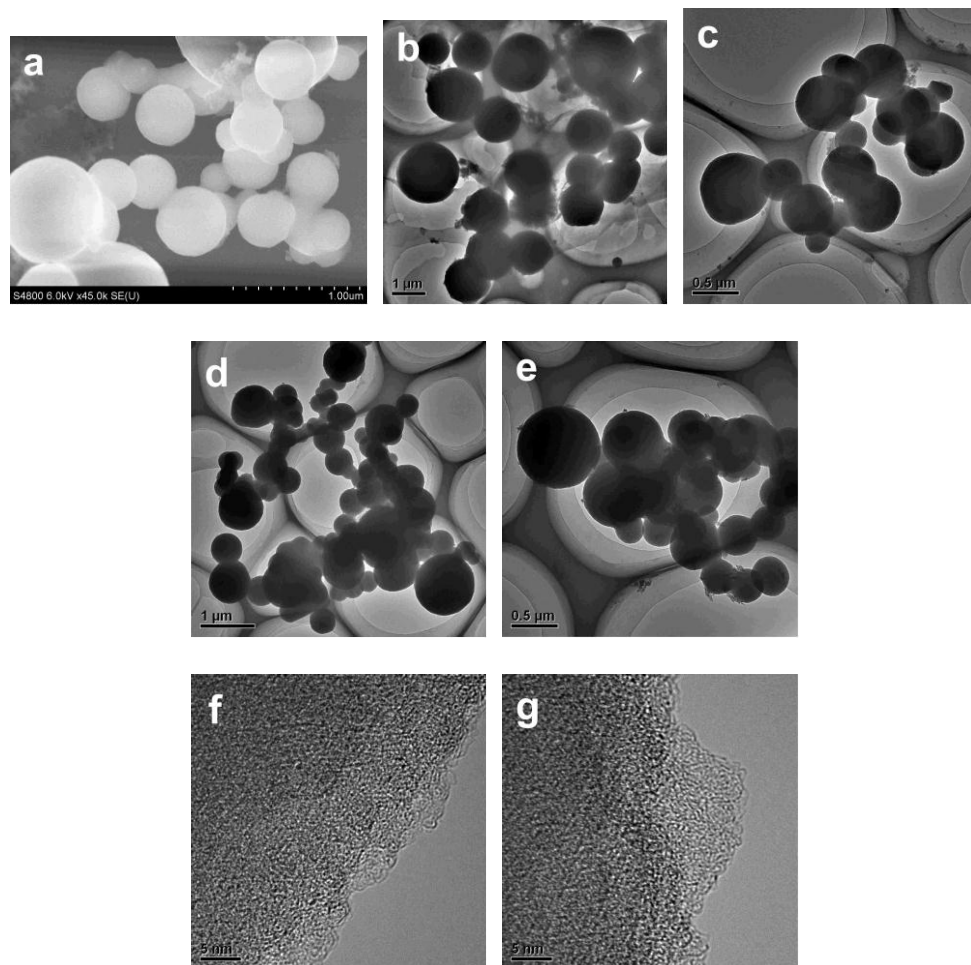

**Fig. S10** SEM (a), TEM (b, c, d, and e), and HR-TEM (f and g) images of **aCDPC** (c and f), **bCDPC** (d and g), **gCDPC** (a and e), and **HMFPC** (b).



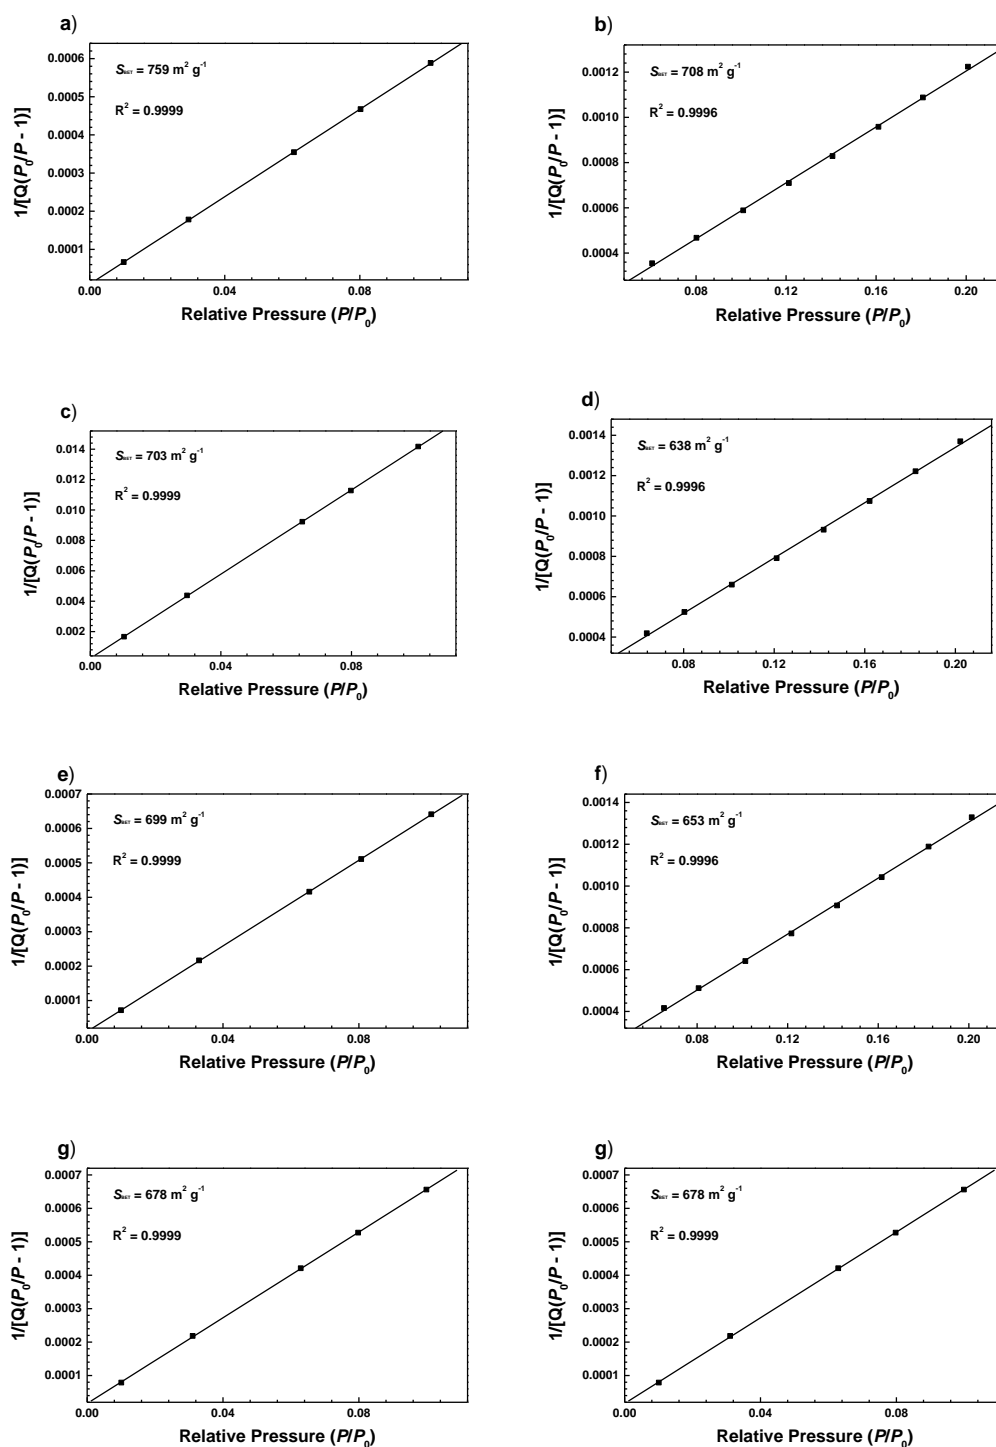

**Fig. S11** BET specific surface area plots for **HMFPC** (a, b), **aCDPC** (c, d), **bCDPC** (e, f), and **gCDPC** (g, h) calculated over different relative pressure ranges:  $P/P_0 = 0.01-0.10$  (a, c, e, and g) and  $P/P_0 = 0.05-0.20$  (b, d, f, and h), respectively.

**Table S2** BET specific surface area data calculated over different pressure ranges

| Sample       | $P/P_0$ range | $S_{\text{BET}}$<br>( $\text{m}^2 \text{g}^{-1}$ ) | Correlation<br>Coefficient | Number of<br>Points | $C$ constant <sup>a</sup> |
|--------------|---------------|----------------------------------------------------|----------------------------|---------------------|---------------------------|
| <b>HMFC</b>  | 0.01–0.10     | 759                                                | 0.9999                     | 5                   | 645                       |
| <b>HMFC</b>  | 0.05–0.20     | 708                                                | 0.9996                     | 8                   | –198                      |
| <b>aCDPC</b> | 0.01–0.10     | 703                                                | 0.9999                     | 5                   | 577                       |
| <b>aCDPC</b> | 0.05–0.20     | 636                                                | 0.9996                     | 8                   | –224                      |
| <b>bCDPC</b> | 0.01–0.10     | 616                                                | 0.9999                     | 5                   | 616                       |
| <b>bCDPC</b> | 0.05–0.20     | 653                                                | 0.9996                     | 8                   | –199                      |
| <b>gCDPC</b> | 0.01–0.10     | 678                                                | 0.9999                     | 5                   | 340                       |
| <b>gCDPC</b> | 0.05–0.20     | 652                                                | 0.9998                     | 8                   | –758                      |

<sup>a</sup> The low relative pressure range of 0.01–0.10 using five points gives the higher  $C$  constant values and therefore the best fit to the BET equation.

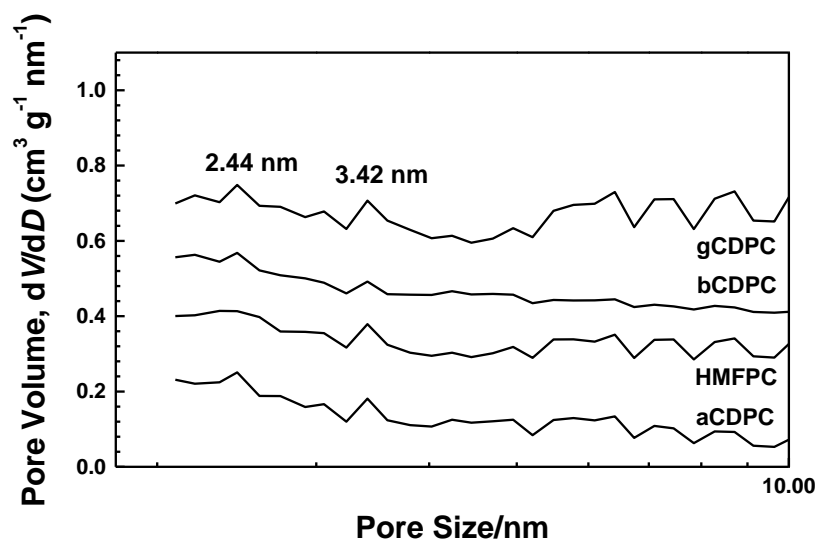

**Fig. S12** Pore size distribution profiles calculated by the original DFT method in the mesopore range. The profiles of **HMFPC**, **bCDPC**, and **gCDPC** have also been offset by 0.2 unit for the purpose of clarity.
